# Supplementary material
Source: PubMed Central journal article supplement (PMC11376777)
Supplement: PBI-21-635-s001.pdf [file PBI-21-635-s001.pdf]

## Supplementary Figure 1

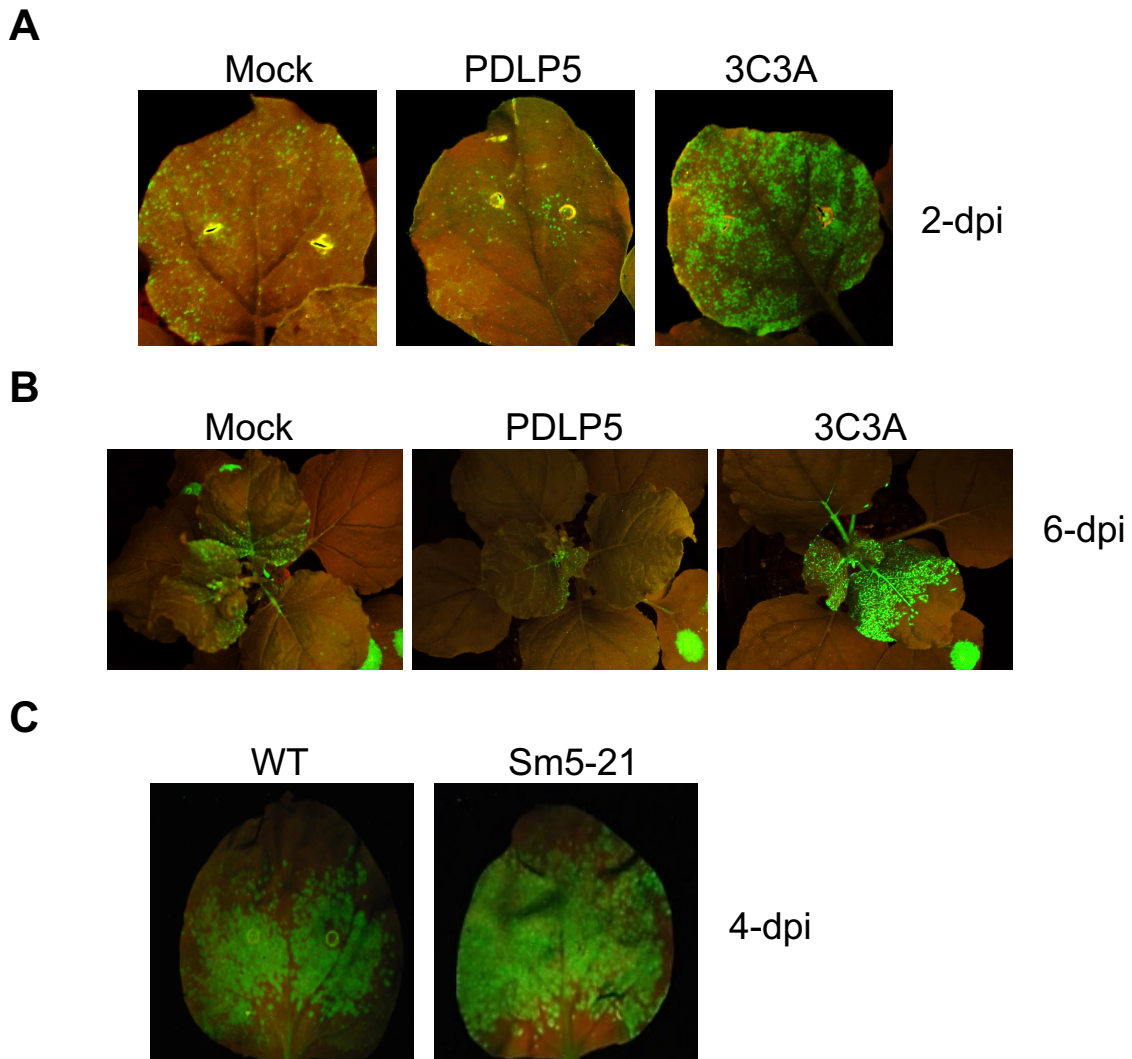

Representative photographs showing the effect of 3C3A on PVX-GFP movement. A) Spread of PVX-GFP in local leaves. WT plants (3.5-week-old) were pre-treated with mock (empty vector), PDLP5 or 3C3A mixed 1:1 with p19 by infiltrating mature leaves fully with agrobacterial suspension carrying each plasmid. Three days later, the same leaves were infiltrated fully with a suspension of agrobacteria carrying PVX-GFP vector (pGR-PVX-GFP). B) Effect of 3C3A on the systemic movement of PVX-GFP. Initial treatment as for (A), but secondary infiltration of PVX-GFP comprised two spots of 0.1 mL per leaf (one of which is visible in the lower right region of each image). Final ODs of agrobacterial suspension used in A and B are 0.35 for mock (empty vector), PDLP5 or 3C3A; 0.5 for p19; and 0.01 for PVX-GFP. C) Leaves of WT and SM5-21 infected with PVX-GFP by agroinfiltration (final  $OD_{600nm}=0.5$ ). Photos were taken under a BlackRay UV lamp using a D3500 Nikon camera at different days post infiltration (dpi) of the viral vector.

## Supplementary Figure 2

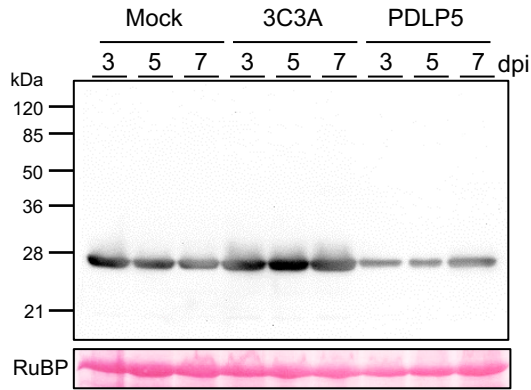

Representative image of Western blot analysis. The effect of introducing 3C3A by transient expression in WT *N. benthamiana* plants for viral vector driven protein expression using TMV-GFP. Leaves were first infiltrated with *Agrobacteria* carrying 3C3A at final  $OD_{600nm}=0.35$  for pre-treatment and 3-days later the same leaves were infiltrated with *Agrobacteria* carrying TMV-GFP at final  $OD_{600nm}=0.2$ . Infiltrated leaves were collected at 3, 5, and 7 dpi. Protein extracts were prepared in a buffer containing 50 mM Tris-HCl, pH 7.5, 150 mM NaCl, 5 mM EDTA, and protease inhibitors. Western blot analysis was performed using anti-GFP as primary and HRP-conjugated anti-rabbit as secondary antibodies, respectively. RuBP, Rubisco. The experiment was performed on multiple plants per treatment and repeated three times.

### Supplementary Figure 3

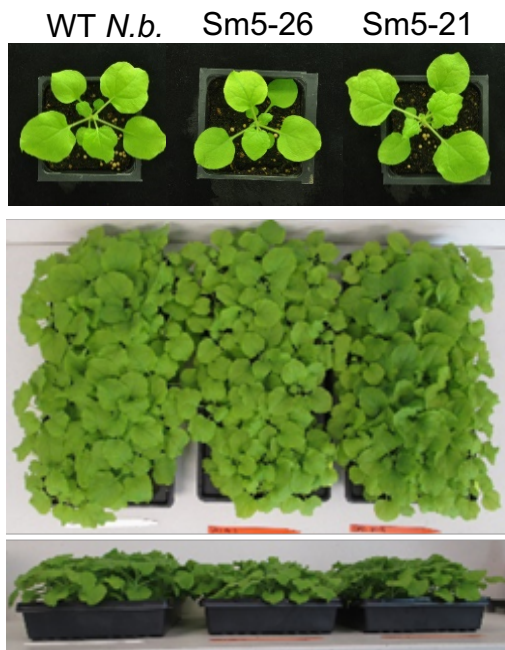

Representative images of *N. benthamiana* WT (WT *N.b.*) and transgenic Sm5-21 and Sm5-26 individual plants and trays of plants.

## Supplementary Figure 4

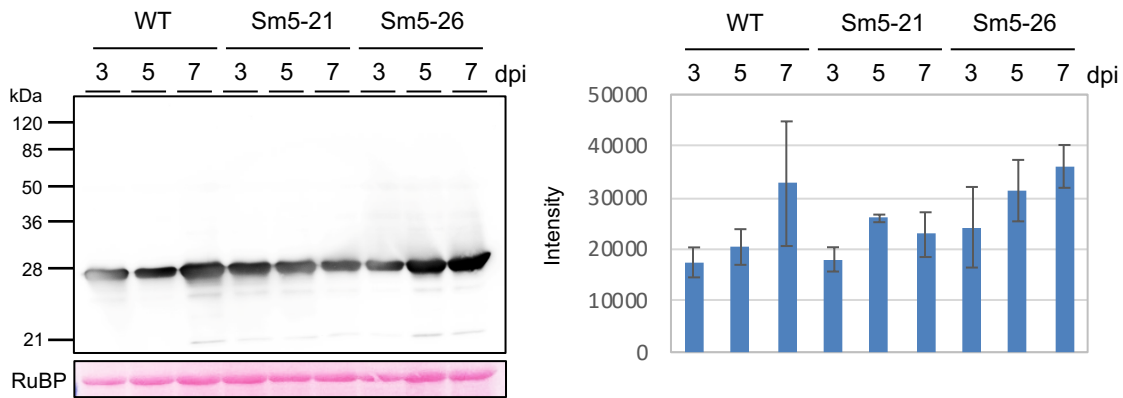

Representative image of Western blot analysis and quantification. The effect of 3C3A on non-viral vector driven protein expression using a binary vector carrying EGFP (pART-GFP). GFP expression levels were compared using WT and Sm5-21 and Sm5-26 transgenic plants. Leaves were infiltrated with *Agrobacteria* carrying pART-GFP at a final  $OD_{600nm}=0.7$  and collected at 3, 5, and 7 dpi. Protein extracts were prepared in a buffer containing 50 mM Tris-HCl, pH 7.5, 150 mM NaCl, 5 mM EDTA, and protease inhibitors. Western blot analysis was performed using anti-GFP as primary and HRP-conjugated anti-rabbit as secondary antibodies, respectively. RuBP, Rubisco. The experiment was performed on multiple plants per treatment and repeated 3 times, and the quantification result of the experiment is presented in a bar graph. The signal intensity of protein bands detected on Western blots was measured using Image J software (Fiji). Error bars, standard error ( $\pm$ SE).

## Supplementary Figure 5

**A**

| Plant host | Protein accumulation at 7 dpi<br>(mg/kg leaf) |              |
|------------|-----------------------------------------------|--------------|
|            | YFE-1                                         | PA83         |
| WT         | 183.5 (100%)                                  | 223.7 (100%) |
| Sm5-21     | 260 (140%)                                    | 261.3 (117%) |
| Sm5-26     | 301.5 (163%)                                  | 325.7 (146%) |

**B**

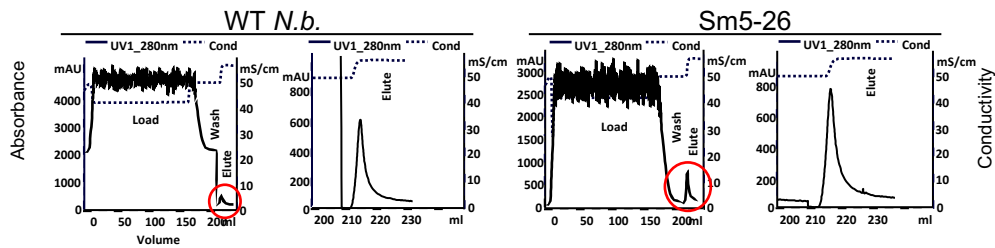

**C**

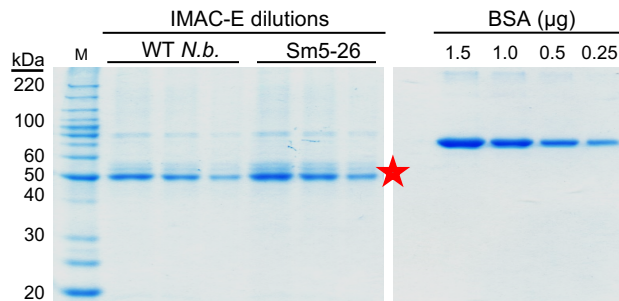

**D**

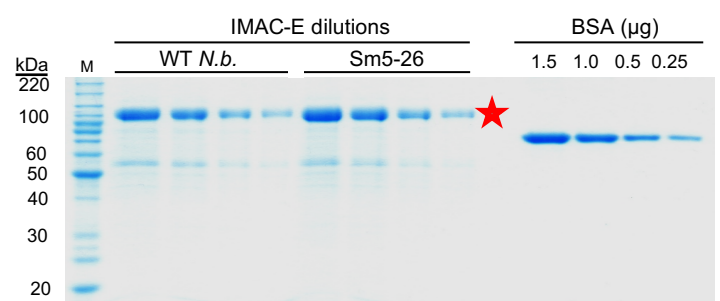

A) A summary of target protein accumulation for YFE-1 and PA83 from WT, Sm5-21 and Sm5-26 plants from the data presented in main Figure 4 C-F. B) Protein absorbance profiles for IMAC of soluble extracts from WT and Sm5-26 plants expressing PA83. C and D) Recovery of expressed recombinant protein targets from aerial biomass of transgenic 3C3A plants. SDS-PAGE analysis of IMAC purified YFE-1 (C) and PA83 (D), respectively. Soluble proteins were extracted from WT and Sm5-26 plants at 6 dpi and purified using IMAC. Peak elution fractions (IMAC-E) were pooled and serially diluted to resolve by SDS-PAGE to quantify the protein yields, with bovine serum albumin (BSA) protein standards. Red stars indicate the expressed recombinant proteins.

**Supplementary Table 1.** Information related to vectors used in this study.

| Plasmids or genes                                            | References and/or sources                                                                                                                                                                                                                                                                       |
|--------------------------------------------------------------|-------------------------------------------------------------------------------------------------------------------------------------------------------------------------------------------------------------------------------------------------------------------------------------------------|
| pGWB                                                         | Provided by T. Nakagawa (Nakagawa et al., J Biosci Bioeng. 2007 Jul;104(1):34-41).                                                                                                                                                                                                              |
| cYFP                                                         | CitrineYFP ( <a href="https://www.fpbase.org/protein/citrine/">https://www.fpbase.org/protein/citrine/</a> ) provided by R. Tsien (Griesbeck et al., 2001, JBC 276:29188-29194).                                                                                                                |
| TMV-GFP                                                      | pSPDK661 (TMV-GFP) provided by S.P. Dinesh-Kumar (Liu et al., 2002, Plant J 30:415-429).                                                                                                                                                                                                        |
| pBI121                                                       | <a href="https://www.snapgene.com/resources/plasmid-files/?set=plant_vectors&amp;plasmid=pBI121">https://www.snapgene.com/resources/plasmid-files/?set=plant_vectors&amp;plasmid=pBI121</a> (Chen et al., 2003, Mol Breeding 11:287-293).                                                       |
| pART                                                         | Provided by J. Bowman (Gleave AP, 1992, Plant Mol Biol 20 1203–1207)                                                                                                                                                                                                                            |
| p19                                                          | pBIN35S:p19 provided by J. Caplan (Voinnet et al., 2003, Plant J. 33: 949–956).                                                                                                                                                                                                                 |
| P1/HC-Pro                                                    | Provided by V. Dolja (Chapman et al., Genes & Dev 18: 1179-1186).                                                                                                                                                                                                                               |
| pGreen-based expression vector carrying TMV genome sequences | TMV genome sequences of pBID4 (Musiychuk et al., 2007, Influenza Other Respir. Viruses, 1:19-25) introduced into the pGreen binary vector (Hellens et al., 2000, Plant Mol Biol 42: 819–832).                                                                                                   |
| pBI-D                                                        | <i>Cauliflower mosaic virus</i> (CaMV) 35S promoter and <i>A. tumefaciens</i> nopaline synthase (Nos) terminator of pBI121 replaced with CaMV 35S promoter with dual enhancer sequences plus the 5' non-translated leader sequence of Tobacco etch virus and with 35S terminator, respectively. |
| pGR-PVX-GFP                                                  | PVX genome sequences and GFP reporter introduced into the pGreen binary vector (Hellens, et al., 2000, Plant Mol Biol 42: 819–832).                                                                                                                                                             |

**Supplementary Table 2.** An evaluation summary of transgenic Sm5 *N. benthamiana* lines.

| Expression construct | Plant ID | Confirmed by RT-PCR | Confirmed by PCR | Segregation <sup>‡</sup> (Kan plates) | TMV-GFP foci growth |
|----------------------|----------|---------------------|------------------|---------------------------------------|---------------------|
| pBI-S-PDLP5m5        | Sm5-5    | +                   | n.d.             | 42R : 8S                              | n.d.                |
|                      | Sm5-8    | +                   | +                | 45R : 5S                              | n.d.                |
|                      | Sm5-9    | +                   | +                | 46R : 2S                              | n.d.                |
|                      | Sm5-10   | +                   | +                | 42R : 8S                              | +++                 |
|                      | Sm5-13   | +                   | n.d.             | 49R : 1S                              | n.d.                |
|                      | Sm5-16   | +                   | n.d.             | 50R                                   | +++                 |
|                      | Sm5-17   | +                   | n.d.             | n.d.                                  | n.d.                |
|                      | Sm5-20   | +                   | +                | n.d.                                  | n.d.                |
|                      | Sm5-21   | +                   | +                | 32R : 18S                             | ++++                |
|                      | Sm5-26   | +                   | n.d.             | 40R : 10S                             | ++++                |
|                      | Sm5-34   | n.d.                | +                | 50R                                   | ++                  |
|                      | Sm5-63   | n.d.                | +                | 38R : 10S                             | ++                  |
|                      | Sm5-64   | n.d.                | +                | 28R : 10S                             | +++                 |
|                      | Sm5-65   | n.d.                | +                | 28R : 12S                             | ++                  |
|                      | Sm5-66   | n.d.                | +                | 46R : 1S                              | +++                 |

n.d., not determined. +, relative extent to which foci growths are observed (++++, high; +++, moderate; ++, mild). <sup>‡</sup>T1 seeds were analyzed.
